# Supplementary material for: Pressure-Free Assembling of Poly(methyl methacrylate) Microdevices via Microwave-Assisted Solvent Bonding and Its Biomedical Applications
Source: MDPI journal article supplement (doi:10.3390/bios11120526), 2021-12-20
Supplement: s1 [file s1]

# Pressure-free assembling of poly(methyl methacrylate) microdevices via microwave-assisted solvent bonding and its biomedical applications

Kieu The Loan Trinh <sup>1</sup>, Woo Ri Chae <sup>2</sup> and Nae Yoon Lee <sup>2,\*</sup>

<sup>1</sup> Department of Industrial Environmental Engineering, Gachon University, 1342 Seongnam-daero, Sujeong-gu, Seongnam-si, Gyeonggi-do, 13120, Korea; tktloan@gmail.com (K.T.L.T.)

<sup>2</sup> Department of BioNano Technology, Gachon University, 1342 Seongnam-daero, Sujeong-gu, Seongnam-si, Gyeonggi-do, 13120, Korea.; findingwoori@gmail.com (W.R.C.); nylee@gachon.ac.kr (N.Y.L.)

\* Correspondence: nylee@gachon.ac.kr

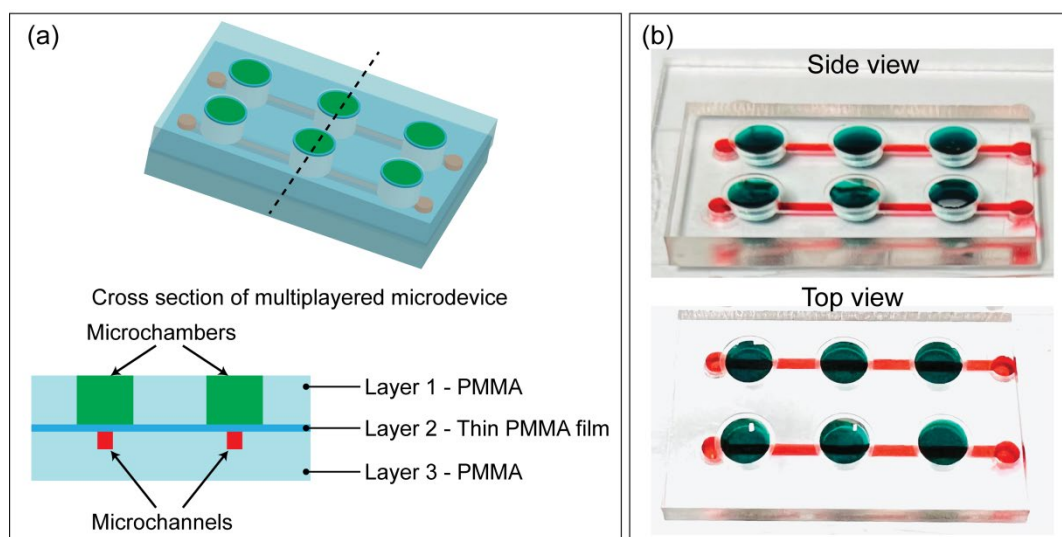

**Figure S1.** Multilayer bonding of a PMMA microdevice by acetic acid and microwave treatment. **(a)** Illustration of the device design where PMMA layers 1-3 are bonded to form top microchambers and bottom microchannels separated by a thin PMMA film in the middle. **(b)** Pictures of the fabricated multilayered PMMA microdevice with inks loaded.

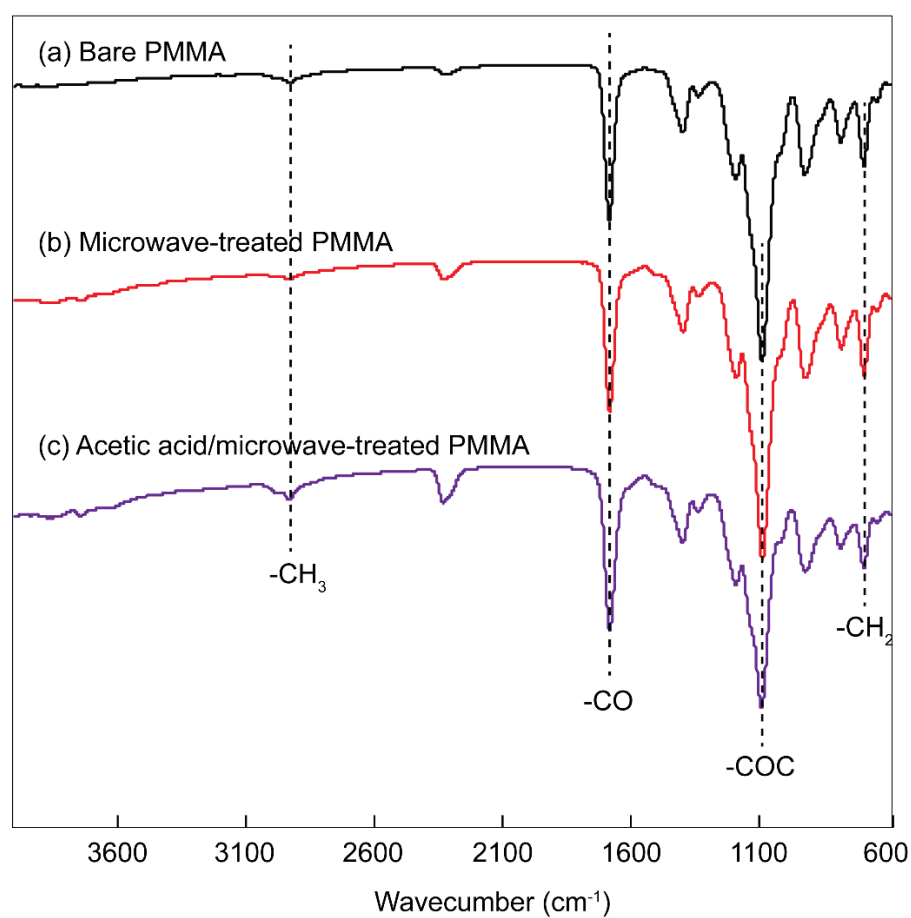

**Figure S2.** Comparative FTIR spectra of bare PMMA, microwave-treated PMMA, and acetic acid/microwave-treated PMMA.
